# Supplementary material for: Location matters: spatial dynamics of tumor-infiltrating T cell subsets is prognostic in colon cancer
Source: Frontiers journal article supplement (doi:10.3389/fimmu.2024.1293618), 2024-02-05
Supplement: Data_Sheet_6.PDF [file Data_Sheet_6.PDF]

| Characteristics           | N (%)      | ICR Low<br>N=30<br>(33.3%) | ICR Medium<br>N=40<br>(44.4%) | ICR High<br>N=20<br>(22.2%) | P value*     |
|---------------------------|------------|----------------------------|-------------------------------|-----------------------------|--------------|
| Median age (range), years | 69 (26-88) | 66 (39-83)                 | 75 (53-88)                    | 71 (26-84)                  | <b>0.040</b> |
| Sex                       |            |                            |                               |                             |              |
| Female                    | 40 (44.4%) | 8 (26.7%)                  | 24 (60%)                      | 8 (40%)                     | <b>0.019</b> |
| Male                      | 50 (55.6%) | 22 (73.3%)                 | 16 (40%)                      | 12 (60%)                    |              |
| Anatomy location          |            |                            |                               |                             |              |
| Left sided                | 50 (55.6%) | 20 (66.7%)                 | 19 (47.5%)                    | 11 (55%)                    | 0.279        |
| Right sided               | 40 (44.4%) | 10 (33.3%)                 | 21 (52.5%)                    | 9 (45%)                     |              |
| Adjuvant treatment        |            |                            |                               |                             |              |
| Yes                       | 27 (30%)   | 11 (36.7%)                 | 10 (25%)                      | 6 (30%)                     | 0.574        |
| No                        | 63 (70%)   | 19 (63.3%)                 | 30 (75%)                      | 14 (70%)                    |              |
| AJCC staging              |            |                            |                               |                             |              |
| I                         | 18 (20.0%) | 5 (16.7%)                  | 7 (17.5%)                     | 6 (30%)                     | 0.460        |
| II                        | 35 (38.9%) | 10 (33.3%)                 | 19 (47.5%)                    | 6 (30%)                     |              |
| III                       | 26 (28.9%) | 9 (30%)                    | 10 (25%)                      | 7 (35%)                     |              |
| IV                        | 11 (12.2%) | 6 (20%)                    | 4 (10%)                       | 1 (5%)                      |              |
| MSI status                |            |                            |                               |                             |              |
| MSI-H                     | 15 (16.7%) | 2 (6.7%)                   | 6 (15%)                       | 7 (35%)                     | <b>0.029</b> |
| MSS                       | 75 (83.3%) | 28 (93.3%)                 | 34 (85%)                      | 13 (65%)                    |              |
| CMS classification        |            |                            |                               |                             |              |
| CMS1                      | 12 (13.3%) | 2 (6.7%)                   | 4 (10%)                       | 6 (30%)                     | 0.149        |
| CMS2                      | 25 (27.8%) | 11 (36.7%)                 | 12 (30%)                      | 2 (10%)                     |              |
| CMS3                      | 19 (21.1%) | 7 (23.3%)                  | 10 (25%)                      | 2 (10%)                     |              |
| CMS4                      | 17 (18.9%) | 5 (16.7%)                  | 6 (15%)                       | 6 (30%)                     |              |
| Mixed                     | 17 (18.9%) | 5 (16.7%)                  | 8 (20%)                       | 4 (20%)                     |              |
